# Supplementary material
Source: PubMed Central journal article supplement (PMC4722862)
Supplement: NIHMS731209-supplement-2.pdf [file NIHMS731209-supplement-2.pdf]

## Supplemental Information

### **Structural Basis for Switch in Receptor Binding Specificity of two H5N1 Hemagglutinin Mutants**

Xueyong Zhu<sup>1</sup>, Karthik Viswanathan<sup>2</sup>, Rahul Raman<sup>2</sup>, Wenli Yu<sup>1</sup>, Ram Sasisekharan<sup>2\*</sup>,  
Ian A. Wilson<sup>1,3\*</sup>

<sup>1</sup>Department of Integrative Structural and Computational Biology, The Scripps Research Institute, La Jolla, CA 92037, USA. <sup>2</sup>Department of Biological Engineering, Koch Institute of Integrative Cancer Research, Infectious Diseases Interdisciplinary Research Group, Singapore-MIT Alliance for Research and Technology, Massachusetts Institute of Technology, Cambridge, MA 02139, USA. <sup>3</sup>Skaggs Institute for Chemical Biology, The Scripps Research Institute, La Jolla, CA 92037, USA.

\*To whom correspondence should be addressed. E-mail: wilson@scripps.edu;  
rams@mit.edu

**Figure S1. Related to Figures 2 to 5. Sequence comparison of the HA1 domains of H5N1 HAs and an H2 HA<sup>a</sup>.**

|                                 |             |                     |                    |               |        |          |             |          |            |    |
|---------------------------------|-------------|---------------------|--------------------|---------------|--------|----------|-------------|----------|------------|----|
| H3 numbering:                   | 10          | 20                  | 30                 | 34            |        |          |             |          |            |    |
| A/duck/Egypt/10185SS/2010       | MEKIVLLLAI  | VSLVKS              | DQICIGYHANN        | STEQVDTIMEKNV |        |          |             |          |            |    |
| A/chicken/Vietnam/NCVD-093/2008 | MEKIVLLLAI  | IIGLVKSDQICVGYHANN  | STEQVDTIMEKNI      |               |        |          |             |          |            |    |
| A/Vietnam/1203/2004             | MEKIVLLFAI  | VSLVKS              | DQICIGYHANN        | STEQVDTIMEKNV |        |          |             |          |            |    |
| A/Indonesia/5/2005              | MEKIVLLLAI  | VSLVKS              | DQICIGYHANN        | STEQVDTIMEKNV |        |          |             |          |            |    |
| A/Singapore/1/1957 (H2N2)       | MAIYLIL     | -LFTAVRGDQICIGYHANN | STEKVD             | TILERNV       |        |          |             |          |            |    |
| H3 numbering:                   | 35          | 40                  | 50                 | 60            | 70     | 80       | 83          |          |            |    |
| A/duck/Egypt/10185SS/2010       | TVTHAQDILEK | THNGKLCNLDG         | VKPLILRDCSVAGWLLGN | PMCDFL        | INVP   |          |             |          |            |    |
| A/chicken/Vietnam/NCVD-093/2008 | TVTHAQDILEK | THNGKLCNLDG         | VKPLILRDCSVAGWLLGN | PMCDFL        | INVS   |          |             |          |            |    |
| A/Vietnam/1203/2004             | TVTHAQDILEK | KHNGKCLDLDG         | VKPLILRDCSVAGWLLGN | PMCDFE        | FINVP  |          |             |          |            |    |
| A/Indonesia/5/2005              | TVTHAQDILEK | THNGKCLDLDG         | VKPLILRDCSVAGWLLGN | PMCDFE        | FINVP  |          |             |          |            |    |
| A/Singapore/1/1957 (H2N2)       | TVTHAKDILEK | THNGKCLKNGIP        | PLELGDCSIAGWLLGN   | PECDRL        | LSVP   |          |             |          |            |    |
| H3 numbering:                   | 83A         | 90                  | 100                | 110           | 120    | 129      |             |          |            |    |
| A/duck/Egypt/10185SS/2010       | EWSYIVEKIN  | PANDLCY             | PGNFNDYEELK        | HLLSRINHF     | FEKIQT | PKNSWSD  |             |          |            |    |
| A/chicken/Vietnam/NCVD-093/2008 | EWSYIVEKAS  | PANGLCY             | PGDFNDYEELK        | HLLSRINHF     | FEKIKI | IPKSYWSN |             |          |            |    |
| A/Vietnam/1203/2004             | EWSYIVEKAN  | PVNDLCY             | PGDFNDYEELK        | HLLSRINHF     | FEKIQI | IPKSSWS  |             |          |            |    |
| A/Indonesia/5/2005              | EWSYIVEKAN  | PNTDLCY             | PGSFNDYEELK        | HLLSRINHF     | FEKIQI | IPKSSWSD |             |          |            |    |
| A/Singapore/1/1957 (H2N2)       | EWSYIMEKEN  | PRDGLCY             | PGSFNDYEELK        | HLLSSVKH      | FEVKIL | PKDRWTQ  |             |          |            |    |
| H3 numbering:                   | 130133a     | 140                 | 150                | 160           | 170    | 178      |             |          |            |    |
| A/duck/Egypt/10185SS/2010       | HEAS        | GVSSAC              | PYQGRSS            | FFRN          | VWLT   | TKKDN    | AYPTIKRSYNN | TNQEDLLV |            |    |
| A/chicken/Vietnam/NCVD-093/2008 | HETS        | GVSSAC              | SYLEN              | PSFFRN        | VWLT   | TKKN     | NTYPP       | IKVNYT   | TNANQKDLLV |    |
| A/Vietnam/1203/2004             | HEAS        | GVSSAC              | PYQGRSS            | FFRN          | VWLT   | IKKN     | STYPT       | IKRSYNN  | TNQEDLLV   |    |
| A/Indonesia/5/2005              | HEAS        | GVSSAC              | PYLGSPS            | FFRN          | VWLT   | IKKN     | STYPT       | IKRSYNN  | TNQEDLLV   |    |
| A/Singapore/1/1957 (H2N2)       | HTTT        | GGSRAC              | AVSGN              | PSFFRN        | MVWLT  | EKGS     | SNYP        | VAKGSYNN | TSGEQLMI   |    |
| H3 numbering:                   | 180         | 190                 | 200                | 210           | 220    | 228      |             |          |            |    |
| A/duck/Egypt/10185SS/2010       | LWGIHHPN    | DATEQ               | TRLYQ              | NPTTYIS       | VGSTLN | QKLV     | PKIATR      | SKVKG    | QSG        |    |
| A/chicken/Vietnam/NCVD-093/2008 | LWGIHHPN    | NEAEQ               | KMIYQ              | NLNTYV        | SVGT   | TLNQR    | LVPKIATR    | SKVNG    | QSG        |    |
| A/Vietnam/1203/2004             | LWGIHHPN    | DAEAEQ              | TKLYQ              | NPTTYIS       | VGSTLN | QRLVP    | RIATR       | SKVNG    | QSG        |    |
| A/Indonesia/5/2005              | LWGIHHPN    | DAEAEQ              | TRLYQ              | NPTTYIS       | IGT    | TLNQR    | LVPKIATR    | SKVNG    | QSG        |    |
| A/Singapore/1/1957 (H2N2)       | IWGVHHPN    | DEKEQ               | TRLYQ              | NVTYV         | SVGT   | TLNKR    | STPD        | IATR     | PKVNG      | LS |
| H3 numbering:                   | 230         | 240                 | 250                | 260           | 270    | 277      |             |          |            |    |
| A/duck/Egypt/10185SS/2010       | RMEFFWT     | IILKSN              | DAINFES            | NGNFI         | APENAY | KIVKGD   | STIMKSE     | LEYGDC   |            |    |
| A/chicken/Vietnam/NCVD-093/2008 | RMDFFWT     | IILKPN              | DINFDS             | NGNFI         | APAYAY | KIVKGD   | SAIMKSE     | LEYGNC   |            |    |
| A/Vietnam/1203/2004             | RMEFFWT     | IILKPN              | DAINFES            | NGNFI         | APAYAY | KIVKGD   | STIMKSE     | LEYGNC   |            |    |
| A/Indonesia/5/2005              | RMEFFWT     | IILKPN              | DAINFES            | NGNFI         | APAYAY | KIVKGD   | SAIMKSE     | LEYGNC   |            |    |
| A/Singapore/1/1957 (H2N2)       | RMEFSWT     | LMLM                | WDTINF             | FESTGN        | LIAPEY | GFKISK   | RSSG        | IMKTE    | GTLENC     |    |
| H3 numbering:                   | 280         | 290                 | 300                | 310           | 320    |          |             |          |            |    |
| A/duck/Egypt/10185SS/2010       | NTKCQTPI    | GAINSS              | MPFHN              | IHPLTIG       | CEPKYV | KS       | NRLVLA      | TGLRNS   | PQGE       |    |
| A/chicken/Vietnam/NCVD-093/2008 | NTKCQTPI    | GAINSS              | MPFHN              | IHPLTIG       | CEPKYV | KS       | NRLVLA      | TGLRN    | APQIE      |    |
| A/Vietnam/1203/2004             | NTKCQTPM    | GAINSS              | MPFHN              | IHPLTIG       | CEPKYV | KS       | NRLVLA      | TGLRNS   | PQRE       |    |
| A/Indonesia/5/2005              | NTKCQTPM    | GAINSS              | MPFHN              | IHPLTIG       | CEPKYV | KS       | NRLVLA      | TGLRNS   | PQRE       |    |
| A/Singapore/1/1957 (H2N2)       | ETKCQTP     | LGAINT              | TLPFH              | NVHPLTIG      | CEPKYV | SEK      | LVLA        | TGLRN    | VPQIE      |    |

<sup>a</sup> H5 HA residues that are critical for the changes from avian to human receptor specificity are highlighted in red and compared to the corresponding residues in human H2 HA. Other important H5 HA residues in the receptor binding sites are highlighted in cyan. Yellow indicates positions of T318I and H110Y mutations outside of the receptor binding site that were important for transmission in ferrets in H5 HAs of A/Vietnam/1203/2004 and A/Indonesia/5/2005. The H3 numbering system is used throughout in this paper.

**A** dkEgy10 *E5.1* H5 LSTc

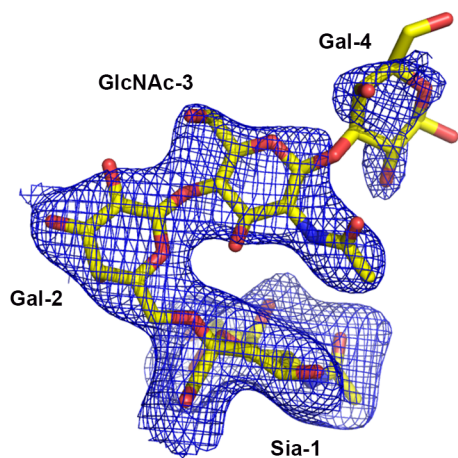

**B** dkEgy10 *E5.1* H5 LSTa

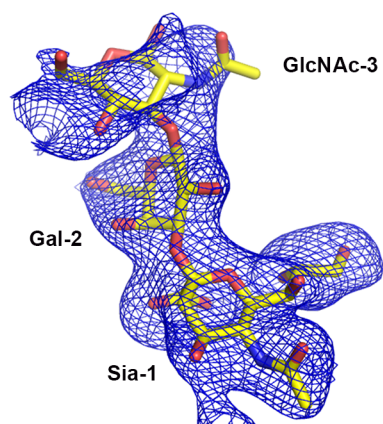

**C** ckViet08 *V4.4* H5 LSTc

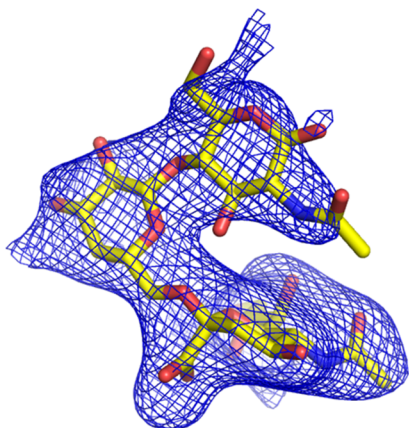

**D** ckViet08 *V4.4* H5 LSTa

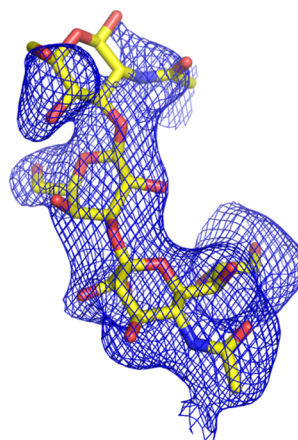

**Figure S2. Related to Figure 1. Simulated annealing omit ( $F_o - F_c$ ) electron density maps of glycan ligands bound to H5 HAs. (A) LSTc bound to *E5.1* HA (2.7 Å resolution). (B) LSTa bound to *E5.1* HA (2.6 Å resolution). (C) LSTc bound to *V4.4* HA (2.7 Å resolution). (D) LSTa bound to *V4.4* HA (2.7 Å resolution). The electron density for the glycan receptors is represented in a blue mesh and contoured at 2.0  $\sigma$ .**

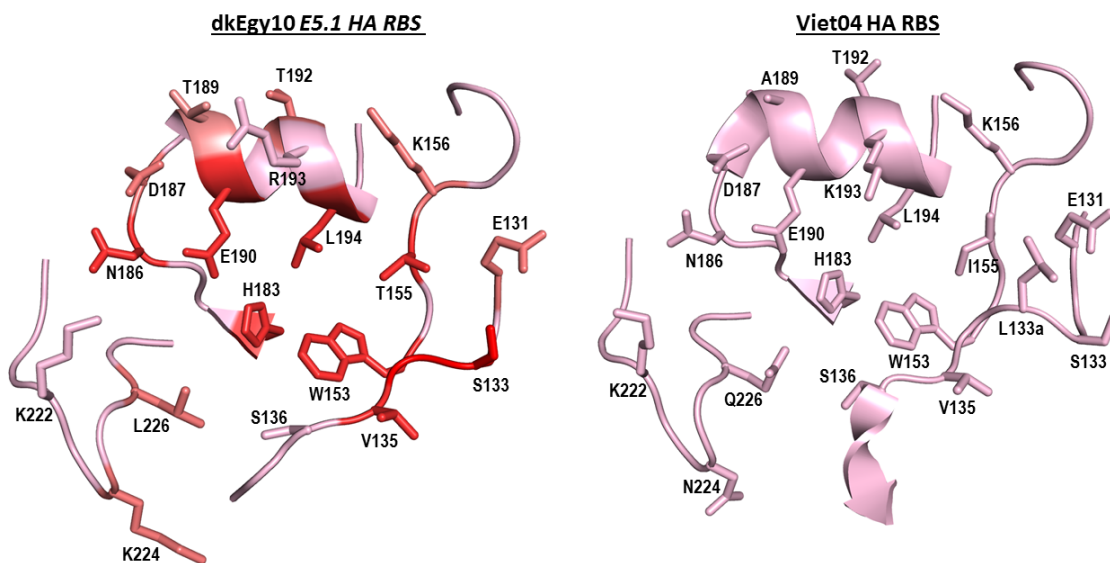

**Figure S3. Related to Figures 2 to 5. Calculation of network properties of key RBS residues in *E5.1* HA.**

The RBS of *E5.1* HA is shown on the left and key residues are labeled and shaded from light to dark red. The darker color represents closer similarity of network property of that residue to the corresponding residue in RBS of human H2 HA. On the right is the RBS of Viet04 HA, which did not acquire any of the 4 molecular features and, hence, has the lowest similarity in terms of network properties with RBS of human H2 HA. Note that residues in *E5.1* HA RBS share a closer similarity in terms of network properties to human H2 HA than their identical counterparts in Viet04 H5 HA RBS.

```

                                133                                158
VIET04-1    LSRINHFEDIQIIPKSSWSSHEASLGVSSACPYQGKSSFFRNVVWLIKKNSTYPTIKRSY
CAMB13-1.1  LSRINHFEDIQIIPKNSWPSHEASLGVSSACPYQGQSFFRNVVWLIKKNNTYPTIKRSY
HEBE05-7    LSRINHFEDIQIIPKSSWDHGCASSGVSSACSYLGKPSFFRNVVWLIKKNNTYPPIKVSY
VIET08-7.2  LSRINHFEDIKIIPKSYWSNHTSTGVSRACAYLENPSFFRNVVWLTKKNNAYPPIKVNY
MONG05-2.2  LSRINHFEDIQIIPKSSWDHEASSGVSSACPYQGRSSFFRNVVWLIKKNDNAYPTIKRSY
EGT10-2.2.1 LSRINHFEDIQITPKNSWDHEASGVSSACPYQGRSSFFRNVVWLTTKKDNAYPTIKRSY
                                193                                226
VIET04-1    NNTNQEDLLVLWGIHHPNDAAEQTKLYQNPTTYISVGTSTLNQRLVPRIATRSKVNGQSG
CAMB13-1.1  NNTNQEDLLVMWGIHHPNDAVEQTKLYQNPTTYISVGTSTLNQRLTPRIATRSKVKGLSG
HEBE05-7    NNTNQEDLLVLWGIHHPNDEAEQIKLYQNPTTYISVGTSTLNQRLVPKIATRSKVNGQSG
VIET08-7.2  TNANQKDLLVLWGIHHPNDEAEQRTLYQNLNTYVSVGTSTLNQRLVPKIATRSKVNGLSS
MONG05-2.2  NNTNQEDLLVLWGIHHPNDAAEQTRLYQNPTTYISVGTSTLNQRLVPKIATRSKVNGQSG
EGT10-2.2.1 NNTNQEDLLVLWGIHHPNDATEQTRLYQNPTTYISVGTSTLNQKLVPKIATRSKVKQSG

```

| Abbreviation | H5 clade | Strain name                      |
|--------------|----------|----------------------------------|
| VIET04       | 1        | A/Vietnam/1203/2004              |
| CAMB13       | 1.1      | A/Cambodia/X0810301/2013         |
| HEBE05       | 7        | A/chicken/Hebei/326/2005         |
| VIET08       | 7.2      | A/chicken/Vietnam/NCVD-093/08    |
| MONG05       | 2.2      | A/whooper swan/Mongolia/244/2005 |
| EGT10        | 2.2.1    | A/duck/Egypt/10185SS/2010        |

**Figure S4. Related to Figures 2 to 5. Evolution of RBS features in representative H5 clades.** Shown below is a sequence alignment of the RBS-spanning region (residues 108-228) from H5 clades discussed in the main text. For each clade, a strain representative of a recent RBS variant and an older prototype strain are shown. Amino acids that contribute to features 1, 2, 3 and 4 are highlighted in cyan, grey, green and yellow, respectively. RBS features that have evolved to match human-adapted H2 HA are shown in red. Details of the HAs employed in the alignment are shown in the table above.
